# Supplementary material
Source: PubMed Central journal article supplement (PMC5812265)

**A**

Case A

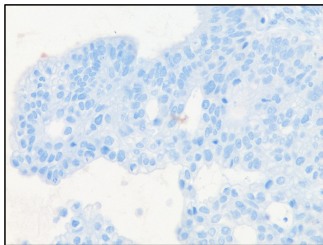14412 (RAS<sup>G12V</sup>)

Case B

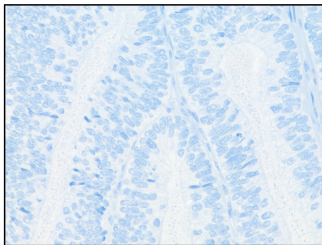14429 (RAS<sup>G12D</sup>)**B**

Control Case A Case B

KRAS (G12D)

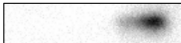

KRAS (G12V)

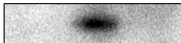

Tubulin

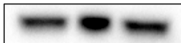

Supplement: NIHMS940380-supplement-Supplemental_Figure_2.pdf [file NIHMS940380-supplement-Supplemental_Figure_2.pdf]
